# Supplementary material for: "Tremendous financial burden": Crowdfunding for organ transplantation costs in Canada
Source: PubMed Central journal article supplement (PMC6924656; doi:10.1371/journal.pone.0226686), 2019-12-20
Supplement: pone.0226686.s001.pdf [file pone.0226686.s001.pdf]

| Title                                    | URL                                                                                                                                               |
|------------------------------------------|---------------------------------------------------------------------------------------------------------------------------------------------------|
| Deb's Journey with Liver Transplant      | <a href="https://www.gofundme.com/27Uccx6g">https://www.gofundme.com/27Uccx6g</a>                                                                 |
| Liver Transplant For Alexis              | <a href="https://www.gofundme.com/fmk3xc">https://www.gofundme.com/fmk3xc</a>                                                                     |
| Liver Liver Transplant                   | <a href="https://www.gofundme.com/9ie-liver-transplant">https://www.gofundme.com/9ie-liver-transplant</a>                                         |
| Pat is waiting for Liver Transplant      | <a href="https://www.gofundme.com/pat-is-waiting-for-liver-transplant">https://www.gofundme.com/pat-is-waiting-for-liver-transplant</a>           |
| Saving Karen Liver Transplant            | <a href="https://www.gofundme.com/Saving-Karen">https://www.gofundme.com/Saving-Karen</a>                                                         |
| Torri's & Kyle's Liver Transplant        | <a href="https://www.gofundme.com/torri-kylas-liver-transplant">https://www.gofundme.com/torri-kylas-liver-transplant</a>                         |
| Ronn's Liver Transplant Recovery         | <a href="https://www.gofundme.com/ronnidixie">https://www.gofundme.com/ronnidixie</a>                                                             |
| Karen's Liver Transplant                 | <a href="https://www.gofundme.com/karens-liver-transplant">https://www.gofundme.com/karens-liver-transplant</a>                                   |
| Barry Willford's Liver Transplant        | <a href="https://www.gofundme.com/barrys-liver-transplant-fund">https://www.gofundme.com/barrys-liver-transplant-fund</a>                         |
| Marian's Liver Transplant                | <a href="https://www.gofundme.com/marian-brown-liver-transplant">https://www.gofundme.com/marian-brown-liver-transplant</a>                       |
| Rhoda's Liver Transplant Recovery        | <a href="https://www.gofundme.com/27q218">https://www.gofundme.com/27q218</a>                                                                     |
| Mike needs a liver transplant            | <a href="https://www.gofundme.com/25xfhmw4">https://www.gofundme.com/25xfhmw4</a>                                                                 |
| Bob's Liver transplant                   | <a href="https://www.gofundme.com/bobs-liver-transplant">https://www.gofundme.com/bobs-liver-transplant</a>                                       |
| Baby Nash Needs A Liver Transplant       | <a href="https://www.gofundme.com/agg8eec">https://www.gofundme.com/agg8eec</a>                                                                   |
| Erica's Liver Transplant                 | <a href="https://www.gofundme.com/ericas-liver-transplant">https://www.gofundme.com/ericas-liver-transplant</a>                                   |
| Gabriela's Liver Transplant              | <a href="https://www.gofundme.com/2mehyc">https://www.gofundme.com/2mehyc</a>                                                                     |
| Natalie Williams - Liver Transplant      | <a href="https://www.gofundme.com/natalies-liver-transplant">https://www.gofundme.com/natalies-liver-transplant</a>                               |
| Sandy's liver transplant journey         | <a href="https://www.gofundme.com/p-8hkh">https://www.gofundme.com/p-8hkh</a>                                                                     |
| Megan Fraser liver transplant            | <a href="https://www.gofundme.com/2zr9k3w">https://www.gofundme.com/2zr9k3w</a>                                                                   |
| Jennifer's liver transplant fund         | <a href="https://www.gofundme.com/8g2uvkuw">https://www.gofundme.com/8g2uvkuw</a>                                                                 |
| Douglas MCD Liver Transplant             | <a href="https://www.gofundme.com/dougs-liver-transplant">https://www.gofundme.com/dougs-liver-transplant</a>                                     |
| Chris Bordush's Liver Transplant         | <a href="https://www.gofundme.com/chrisbordush">https://www.gofundme.com/chrisbordush</a>                                                         |
| Glen Leeman Liver Transplant             | <a href="https://www.gofundme.com/glen-leeman-liver-transplant">https://www.gofundme.com/glen-leeman-liver-transplant</a>                         |
| Saman's Fund for Liver Transplant        | <a href="https://www.gofundme.com/1f8lbg">https://www.gofundme.com/1f8lbg</a>                                                                     |
| Chantal's liver transplant               | <a href="https://www.gofundme.com/h239qzw">https://www.gofundme.com/h239qzw</a>                                                                   |
| Mikylah's Liver Transplant               | <a href="https://www.gofundme.com/mikylah">https://www.gofundme.com/mikylah</a>                                                                   |
| Pat Penton's liver transplant            | <a href="https://www.gofundme.com/k55gfk">https://www.gofundme.com/k55gfk</a>                                                                     |
| Courtney's Liver Transplant Fund         | <a href="https://www.gofundme.com/radnak">https://www.gofundme.com/radnak</a>                                                                     |
| Andrew Bruntton's Liver Transplant       | <a href="https://www.gofundme.com/Andrewbruntton">https://www.gofundme.com/Andrewbruntton</a>                                                     |
| Cathy's Liver Transplant Fund            | <a href="https://www.gofundme.com/CathyLiverFund">https://www.gofundme.com/CathyLiverFund</a>                                                     |
| Pastor Arnold's Liver Transplant         | <a href="https://www.gofundme.com/pastor-arnolds-liver-transplant">https://www.gofundme.com/pastor-arnolds-liver-transplant</a>                   |
| Jasmine's Liver Transplant Fund          | <a href="https://www.gofundme.com/KleiboerFamily">https://www.gofundme.com/KleiboerFamily</a>                                                     |
| Terry's Liver Transplant                 | <a href="https://www.gofundme.com/terrys-liver-transplant">https://www.gofundme.com/terrys-liver-transplant</a>                                   |
| Farrah's liver transplant                | <a href="https://www.gofundme.com/farrahs-liver-transplant">https://www.gofundme.com/farrahs-liver-transplant</a>                                 |
| Make Robyn's Liver Transplant happen     | <a href="https://www.gofundme.com/5g3xciw">https://www.gofundme.com/5g3xciw</a>                                                                   |
| Liver transplant assessment              | <a href="https://www.gofundme.com/liver-transplant-assessment">https://www.gofundme.com/liver-transplant-assessment</a>                           |
| LIVER TRANSPLANT N.B. Canada             | <a href="https://www.gofundme.com/2888b3s">https://www.gofundme.com/2888b3s</a>                                                                   |
| Mike's fight for a liver transplant      | <a href="https://www.gofundme.com/mikes-fight-for-a-liver-transplant">https://www.gofundme.com/mikes-fight-for-a-liver-transplant</a>             |
| Liver Transplant Cancer Conflict         | <a href="https://www.gofundme.com/liver-transplant-cancer-conflict">https://www.gofundme.com/liver-transplant-cancer-conflict</a>                 |
| Braedon's story                          | <a href="https://www.gofundme.com/braedons-story">https://www.gofundme.com/braedons-story</a>                                                     |
| Greta's battle against cancer            | <a href="https://www.gofundme.com/gretaguardians">https://www.gofundme.com/gretaguardians</a>                                                     |
| Sweet Tala's Journey To Health           | <a href="https://www.gofundme.com/3m63img">https://www.gofundme.com/3m63img</a>                                                                   |
| Princess Ava's Broken Heart Fund         | <a href="https://www.gofundme.com/dvuaqz88">https://www.gofundme.com/dvuaqz88</a>                                                                 |
| Hope for Jackson                         | <a href="https://www.gofundme.com/juyuy-hope-for-jackson">https://www.gofundme.com/juyuy-hope-for-jackson</a>                                     |
| New liver for Dan (Donald Rust)          | <a href="https://www.gofundme.com/liverforDan">https://www.gofundme.com/liverforDan</a>                                                           |
| Help with Wayne kosher medical           | <a href="https://www.gofundme.com/help-with-wayne-kosher-medical">https://www.gofundme.com/help-with-wayne-kosher-medical</a>                     |
| Rally Around the Rievals                 | <a href="https://www.gofundme.com/rally-around-the-rievals">https://www.gofundme.com/rally-around-the-rievals</a>                                 |
| Eric's Family Fund                       | <a href="https://www.gofundme.com/Whitbread">https://www.gofundme.com/Whitbread</a>                                                               |
| Roy Howe's health                        | <a href="https://www.gofundme.com/roy-howes-health">https://www.gofundme.com/roy-howes-health</a>                                                 |
| Trina's Liver Journey                    | <a href="https://www.gofundme.com/trinasliverjourney">https://www.gofundme.com/trinasliverjourney</a>                                             |
| Jacob's Journey                          | <a href="https://www.gofundme.com/kp-jacobs-journey">https://www.gofundme.com/kp-jacobs-journey</a>                                               |
| McKenzie's Fund                          | <a href="https://www.gofundme.com/mckenzie-s-fund">https://www.gofundme.com/mckenzie-s-fund</a>                                                   |
| A helping hand for Dan Michie            | <a href="https://www.gofundme.com/2c43jpu">https://www.gofundme.com/2c43jpu</a>                                                                   |
| Support for Tatum                        | <a href="https://www.gofundme.com/support-for-tatum">https://www.gofundme.com/support-for-tatum</a>                                               |
| HELP A FRIEND AND HIS FAMILY.            | <a href="https://www.gofundme.com/helpseanfandador">https://www.gofundme.com/helpseanfandador</a>                                                 |
| Let's Get Rob A Liver!                   | <a href="https://www.gofundme.com/lori-and-robs-liver-troubles">https://www.gofundme.com/lori-and-robs-liver-troubles</a>                         |
| Baby Keaton's Transplant Expenses        | <a href="https://www.gofundme.com/baby-keatons-transplant-expenses">https://www.gofundme.com/baby-keatons-transplant-expenses</a>                 |
| Rosin's Transplant Surgery               | <a href="https://www.gofundme.com/rosins-transplant-surgery">https://www.gofundme.com/rosins-transplant-surgery</a>                               |
| A new liver for Kari                     | <a href="https://www.gofundme.com/a-new-liver-for-kari">https://www.gofundme.com/a-new-liver-for-kari</a>                                         |
| Support Kim while she saves Scott!       | <a href="https://www.gofundme.com/SupportKimSavingScott">https://www.gofundme.com/SupportKimSavingScott</a>                                       |
| Help Rafael Beat Cancer                  | <a href="https://www.gofundme.com/397ey-help-rafael-beat-cancer">https://www.gofundme.com/397ey-help-rafael-beat-cancer</a>                       |
| Kyle's Medical Treatment Fund            | <a href="https://www.gofundme.com/kgb0o">https://www.gofundme.com/kgb0o</a>                                                                       |
| A New Liver for Kristopher               | <a href="https://www.gofundme.com/2K54t5g">https://www.gofundme.com/2K54t5g</a>                                                                   |
| Ktatchuk Family needs our Help!          | <a href="https://www.gofundme.com/rf48gk">https://www.gofundme.com/rf48gk</a>                                                                     |
| Colleen's Cure                           | <a href="https://www.gofundme.com/colleens-cure">https://www.gofundme.com/colleens-cure</a>                                                       |
| Shirley Needs a New Liver                | <a href="https://www.gofundme.com/shirley-needs-a-new-liver">https://www.gofundme.com/shirley-needs-a-new-liver</a>                               |
| Help save Jillian's life                 | <a href="https://www.gofundme.com/v7qf144">https://www.gofundme.com/v7qf144</a>                                                                   |
| Support for Bev Hill's Recovery          | <a href="https://www.gofundme.com/support-for-bev-hills-recovery">https://www.gofundme.com/support-for-bev-hills-recovery</a>                     |
| Help Granny Jo in her recovery           | <a href="https://www.gofundme.com/help-granny-jo-in-her-recovery">https://www.gofundme.com/help-granny-jo-in-her-recovery</a>                     |
| Help Delilah Saunders' legal fund        | <a href="https://www.gofundme.com/help-delilah-saunders">https://www.gofundme.com/help-delilah-saunders</a>                                       |
| Melissa Davies transplant fund           | <a href="https://www.gofundme.com/melissadavies">https://www.gofundme.com/melissadavies</a>                                                       |
| Carrie's Miracle                         | <a href="https://www.gofundme.com/runs-and-carries-miracle">https://www.gofundme.com/runs-and-carries-miracle</a>                                 |
| Osterfund Family                         | <a href="https://www.gofundme.com/Tanya-litan">https://www.gofundme.com/Tanya-litan</a>                                                           |
| Keith Badura ~ Husband's Father's Papa's | <a href="https://www.gofundme.com/2hy4arw">https://www.gofundme.com/2hy4arw</a>                                                                   |
| KRISTA'S 2ND BATTLE WITH CANCER          | <a href="https://www.gofundme.com/25rh9g">https://www.gofundme.com/25rh9g</a>                                                                     |
| Living with Liver Disease                | <a href="https://www.gofundme.com/living-with-liver-disease">https://www.gofundme.com/living-with-liver-disease</a>                               |
| Ethan's Getting A Liver                  | <a href="https://www.gofundme.com/ethans-getting-a-liver">https://www.gofundme.com/ethans-getting-a-liver</a>                                     |
| Korey Cotton's Medical Fund              | <a href="https://www.gofundme.com/korey-cottons-medical-fund">https://www.gofundme.com/korey-cottons-medical-fund</a>                             |
| HelpAlexa                                | <a href="https://www.gofundme.com/prayerforalexa">https://www.gofundme.com/prayerforalexa</a>                                                     |
| Funeral/Living Expenses                  | <a href="https://www.gofundme.com/5388iw">https://www.gofundme.com/5388iw</a>                                                                     |
| Fight with Karen!                        | <a href="https://www.gofundme.com/fight-with-karen">https://www.gofundme.com/fight-with-karen</a>                                                 |
| Support for The Robicheau Family         | <a href="https://www.gofundme.com/the-robicheau-family">https://www.gofundme.com/the-robicheau-family</a>                                         |
| Help My Son /Autoimmune Hepatitis        | <a href="https://www.gofundme.com/kristianoautoimmunehepatitis">https://www.gofundme.com/kristianoautoimmunehepatitis</a>                         |
| Todd Butler Recovery Fund                | <a href="https://www.gofundme.com/s44n5kn5">https://www.gofundme.com/s44n5kn5</a>                                                                 |
| Support for Katie (aka Superwoman)       | <a href="https://www.gofundme.com/support-for-katie-aka-superwoman">https://www.gofundme.com/support-for-katie-aka-superwoman</a>                 |
| Help Lindsay's Fight Against Cancer      | <a href="https://www.gofundme.com/help-lindsay-s-fight-against-cancer">https://www.gofundme.com/help-lindsay-s-fight-against-cancer</a>           |
| Carie's Journey to Health                | <a href="https://www.gofundme.com/1jwef5f">https://www.gofundme.com/1jwef5f</a>                                                                   |
| Help Norma on her Road to Recovery       | <a href="https://www.gofundme.com/HelpNormaRoadtoRecovery">https://www.gofundme.com/HelpNormaRoadtoRecovery</a>                                   |
| Clear Dylan's truck loan                 | <a href="https://www.gofundme.com/dylans-truck-loan">https://www.gofundme.com/dylans-truck-loan</a>                                               |
| Crystal Witty (Priest), Liver Trans      | <a href="https://www.gofundme.com/crystalpriest">https://www.gofundme.com/crystalpriest</a>                                                       |
| Shelby Miller needs our help!            | <a href="https://www.gofundme.com/42z3o">https://www.gofundme.com/42z3o</a>                                                                       |
| Support Sergio's Road to Recovery        | <a href="https://www.gofundme.com/simonetti">https://www.gofundme.com/simonetti</a>                                                               |
| Bring Kaleigh Home For Christmas         | <a href="https://www.gofundme.com/hg23oc">https://www.gofundme.com/hg23oc</a>                                                                     |
| Get busy living with a new liver!        | <a href="https://www.gofundme.com/getbusylivingCindy">https://www.gofundme.com/getbusylivingCindy</a>                                             |
| David's medical fund                     | <a href="https://www.gofundme.com/bd8d-davids-medical-fund">https://www.gofundme.com/bd8d-davids-medical-fund</a>                                 |
| Jody's Time to Survive and Thrive!!      | <a href="https://www.gofundme.com/jodyjody-s-time-to-survive-and-thrive">https://www.gofundme.com/jodyjody-s-time-to-survive-and-thrive</a>       |
| Help For Baby Dax And Family!            | <a href="https://www.gofundme.com/k7y36wek">https://www.gofundme.com/k7y36wek</a>                                                                 |
| Team Sweeney #adamwillbegreatagain       | <a href="https://www.gofundme.com/team-sweeney-adamwillbegreatagain">https://www.gofundme.com/team-sweeney-adamwillbegreatagain</a>               |
| Join the Fight Against PSC               | <a href="https://www.gofundme.com/join-the-fight-against-psc">https://www.gofundme.com/join-the-fight-against-psc</a>                             |
| Tammyn's Healing & Recovery Fund         | <a href="https://www.gofundme.com/tammyns-healing-recovery-fund">https://www.gofundme.com/tammyns-healing-recovery-fund</a>                       |
| The gift of teeth for my stepdad         | <a href="https://www.gofundme.com/the-gift-of-teeth-for-my-stepdad">https://www.gofundme.com/the-gift-of-teeth-for-my-stepdad</a>                 |
| Help Becca's Health                      | <a href="https://www.gofundme.com/help-beccas-health">https://www.gofundme.com/help-beccas-health</a>                                             |
| Let's help Gary Leigh                    | <a href="https://www.gofundme.com/lets-help-gary-leigh">https://www.gofundme.com/lets-help-gary-leigh</a>                                         |
| Mccubbing Family Medical Fund            | <a href="https://www.gofundme.com/b7uh5Sp">https://www.gofundme.com/b7uh5Sp</a>                                                                   |
| Help Support Roy's Family                | <a href="https://www.gofundme.com/wfpj8r">https://www.gofundme.com/wfpj8r</a>                                                                     |
| Join James' Journey                      | <a href="https://www.gofundme.com/join-james-journey">https://www.gofundme.com/join-james-journey</a>                                             |
| Val Chandler's Transplant Fund           | <a href="https://www.gofundme.com/valchandler-transplant-fundraiser">https://www.gofundme.com/valchandler-transplant-fundraiser</a>               |
| A Day For Diane                          | <a href="https://www.gofundme.com/2a0813w">https://www.gofundme.com/2a0813w</a>                                                                   |
| Family In Need                           | <a href="https://www.gofundme.com/5167p4o">https://www.gofundme.com/5167p4o</a>                                                                   |
| A Mother's Christmas Wish                | <a href="https://www.gofundme.com/a-mothers-christmas-wish">https://www.gofundme.com/a-mothers-christmas-wish</a>                                 |
| Help me, help my mom                     | <a href="https://www.gofundme.com/mqvaup-help-me-help-my-mom">https://www.gofundme.com/mqvaup-help-me-help-my-mom</a>                             |
| I need Your Help !!!!!!!!!!!!!           | <a href="https://www.gofundme.com/Cirrhosis">https://www.gofundme.com/Cirrhosis</a>                                                               |
| Support Susie                            | <a href="https://www.gofundme.com/kss434-support-susie">https://www.gofundme.com/kss434-support-susie</a>                                         |
| Richard's Journey                        | <a href="https://www.gofundme.com/h22r24g">https://www.gofundme.com/h22r24g</a>                                                                   |
| Fundraiser for Gilbert Ball              | <a href="https://www.gofundme.com/support8b">https://www.gofundme.com/support8b</a>                                                               |
| Help To Support Dean And Holly           | <a href="https://www.gofundme.com/437nccw">https://www.gofundme.com/437nccw</a>                                                                   |
| BELIEVE in Cindy's Liver Journey         | <a href="https://www.gofundme.com/039believe039-in-cindy039s-liver-journey">https://www.gofundme.com/039believe039-in-cindy039s-liver-journey</a> |
| Chantelle McDermott                      | <a href="https://www.gofundme.com/chantelle-mcdermott">https://www.gofundme.com/chantelle-mcdermott</a>                                           |
| Jennifer Specht's Medical Fund           | <a href="https://www.gofundme.com/jennifer-spechts-medical-fund">https://www.gofundme.com/jennifer-spechts-medical-fund</a>                       |
| Andrew Thomas' Medical Fund              | <a href="https://www.gofundme.com/AndrewThomas">https://www.gofundme.com/AndrewThomas</a>                                                         |
| The Weimar family                        | <a href="https://www.gofundme.com/17fahk">https://www.gofundme.com/17fahk</a>                                                                     |
| Dante Rinaldi Medical Relief Fund        | <a href="https://www.gofundme.com/8maxw8-dante-rinaldi-medical-relief-fund">https://www.gofundme.com/8maxw8-dante-rinaldi-medical-relief-fund</a> |
| Nino's Transplant Recovery Fund          | <a href="https://www.gofundme.com/ninos-transplant-recovery-fund">https://www.gofundme.com/ninos-transplant-recovery-fund</a>                     |
| Prayers and Hope for Ela-Marie           | <a href="https://www.gofundme.com/yggc4d44">https://www.gofundme.com/yggc4d44</a>                                                                 |
| Gerry's medical expenses                 | <a href="https://www.gofundme.com/gerrys-medical-expenses">https://www.gofundme.com/gerrys-medical-expenses</a>                                   |
| Hopes,Dreams, Special Little Things      | <a href="https://www.gofundme.com/hopedreams-special-little-things">https://www.gofundme.com/hopedreams-special-little-things</a>                 |
| Linda Simard's Transplant Fund           | <a href="https://www.gofundme.com/linda-simards-transplant-list-appt">https://www.gofundme.com/linda-simards-transplant-list-appt</a>             |
| New Liver New LIFE                       | <a href="https://www.gofundme.com/1a45ss">https://www.gofundme.com/1a45ss</a>                                                                     |
| Doms Dimes                               | <a href="https://www.gofundme.com/2dms-dimes">https://www.gofundme.com/2dms-dimes</a>                                                             |
| Medical expenses                         | <a href="https://www.gofundme.com/52h636-35">https://www.gofundme.com/52h636-35</a>                                                               |
| Nicky's Care/ Fund                       | <a href="https://www.gofundme.com/NickyLife">https://www.gofundme.com/NickyLife</a>                                                               |
