# Supplementary material for: "Tremendous financial burden": Crowdfunding for organ transplantation costs in Canada
Source: PubMed Central journal article supplement (PMC6924656; doi:10.1371/journal.pone.0226686), 2019-12-20
Supplement: pone.0226686.s002.pdf [file pone.0226686.s002.pdf]

| Title                                | URL                                                                                                                                             |
|--------------------------------------|-------------------------------------------------------------------------------------------------------------------------------------------------|
| It's time to end the agony!          | <a href="https://www.gofundme.com/EndTheAgony">https://www.gofundme.com/EndTheAgony</a>                                                         |
| Raising Awareness of Kidney Health   | <a href="https://www.gofundme.com/DynCingHejection">https://www.gofundme.com/DynCingHejection</a>                                               |
| Johns Medical Trips                  | <a href="https://www.gofundme.com/johns-medical-trips">https://www.gofundme.com/johns-medical-trips</a>                                         |
| I need a kidney to live              | <a href="https://www.gofundme.com/bzghzous">https://www.gofundme.com/bzghzous</a>                                                               |
| Michael Delorme Medical Expenses     | <a href="https://www.gofundme.com/michael-delorme-medical-expenses">https://www.gofundme.com/michael-delorme-medical-expenses</a>               |
| Fight with Karen!                    | <a href="https://www.gofundme.com/fight-with-karen">https://www.gofundme.com/fight-with-karen</a>                                               |
| Jason Laframboise trying to breathe! | <a href="https://www.gofundme.com/otk7po">https://www.gofundme.com/otk7po</a>                                                                   |
| Support baby Caribou/Sincir          | <a href="https://www.gofundme.com/support-baby-caribou/sincir">https://www.gofundme.com/support-baby-caribou/sincir</a>                         |
| Derek's Kidney Transplant            | <a href="https://www.gofundme.com/dereks-chronic-kidney-restoration">https://www.gofundme.com/dereks-chronic-kidney-restoration</a>             |
| Matt Hassens's Kidney Transplant     | <a href="https://www.gofundme.com/matt-hassens-kidney-transplant">https://www.gofundme.com/matt-hassens-kidney-transplant</a>                   |
| Kidney transplant for Ryan Harkness  | <a href="https://www.gofundme.com/kidney-transplant-for-ryan-harkness">https://www.gofundme.com/kidney-transplant-for-ryan-harkness</a>         |
| Enrico's Kidney Transplant           | <a href="https://www.gofundme.com/enrico039s-kidney-transplant">https://www.gofundme.com/enrico039s-kidney-transplant</a>                       |
| Kidney Transplant Medications        | <a href="https://www.gofundme.com/kidney-transplant-medications">https://www.gofundme.com/kidney-transplant-medications</a>                     |
| Kidney transplant family             | <a href="https://www.gofundme.com/keemdz3d">https://www.gofundme.com/keemdz3d</a>                                                               |
| Darren's Kidney Transplant           | <a href="https://www.gofundme.com/o85f7k">https://www.gofundme.com/o85f7k</a>                                                                   |
| Claudia's Kidney Transplant Fund     | <a href="https://www.gofundme.com/claudias-kidney-transplant-fund">https://www.gofundme.com/claudias-kidney-transplant-fund</a>                 |
| Doug ~ No Kidneying Around           | <a href="https://www.gofundme.com/no-kidneying-kidney-transplant">https://www.gofundme.com/no-kidneying-kidney-transplant</a>                   |
| Sarah's kidney transplant fund       | <a href="https://www.gofundme.com/sarahs-kidney-transplant-fund">https://www.gofundme.com/sarahs-kidney-transplant-fund</a>                     |
| Gisely Njambi Kidney Transplant      | <a href="https://www.gofundme.com/gisely-njambi-kidney-transplant">https://www.gofundme.com/gisely-njambi-kidney-transplant</a>                 |
| Kidney Transplant                    | <a href="https://www.gofundme.com/8gfs-kidney-transplant">https://www.gofundme.com/8gfs-kidney-transplant</a>                                   |
| Tori Anger Kidney Transplant         | <a href="https://www.gofundme.com/tori-anger-kidney-transplant-2budhdg">https://www.gofundme.com/tori-anger-kidney-transplant-2budhdg</a>       |
| Mom got call for Kidney Transplant   | <a href="https://www.gofundme.com/mom-got-called-for-transplant">https://www.gofundme.com/mom-got-called-for-transplant</a>                     |
| Kidney Transplant                    | <a href="https://www.gofundme.com/single-dad-with-kidney-disease">https://www.gofundme.com/single-dad-with-kidney-disease</a>                   |
| Kidney Transplant Expense Fund       | <a href="https://www.gofundme.com/alanzopowekidneytransplant">https://www.gofundme.com/alanzopowekidneytransplant</a>                           |
| Ron's kidney transplant              | <a href="https://www.gofundme.com/rons-kidney-transplant">https://www.gofundme.com/rons-kidney-transplant</a>                                   |
| Simeon's Kidney Transplant           | <a href="https://www.gofundme.com/simeons-kidney-transplant">https://www.gofundme.com/simeons-kidney-transplant</a>                             |
| expenses during kidney transplant    | <a href="https://www.gofundme.com/expenses-during-kidney-transplant">https://www.gofundme.com/expenses-during-kidney-transplant</a>             |
| Support Kassie's kidney transplant   | <a href="https://www.gofundme.com/2meqda8">https://www.gofundme.com/2meqda8</a>                                                                 |
| Jodie Wolf's Kidney transplant fund  | <a href="https://www.gofundme.com/5rjkg6c">https://www.gofundme.com/5rjkg6c</a>                                                                 |
| Help Jason w/ Medical Transport      | <a href="https://www.gofundme.com/help-jason-get-a-kidney-transplant">https://www.gofundme.com/help-jason-get-a-kidney-transplant</a>           |
| Kidney Transplant Fund               | <a href="https://www.gofundme.com/robnugokidney-transplant-fund">https://www.gofundme.com/robnugokidney-transplant-fund</a>                     |
| Jenni and Tara's Kidney Transplant   | <a href="https://www.gofundme.com/jenniTaraKidney">https://www.gofundme.com/jenniTaraKidney</a>                                                 |
| Funds for kidney transplant          | <a href="https://www.gofundme.com/5j8yp-funds-for-kidney-transplant">https://www.gofundme.com/5j8yp-funds-for-kidney-transplant</a>             |
| Angeleah's kidney transplant         | <a href="https://www.gofundme.com/angeleahs-kidney-transplant">https://www.gofundme.com/angeleahs-kidney-transplant</a>                         |
| Bobby Bates kidney transplant        | <a href="https://www.gofundme.com/gvmtvs">https://www.gofundme.com/gvmtvs</a>                                                                   |
| Brother/Sis live Kidney Transplant   | <a href="https://www.gofundme.com/Bro-s-Kidney-Trans">https://www.gofundme.com/Bro-s-Kidney-Trans</a>                                           |
| Lornie's Kidney Transplant           | <a href="https://www.gofundme.com/2hanyvc">https://www.gofundme.com/2hanyvc</a>                                                                 |
| Help for Kidney transplant expenses  | <a href="https://www.gofundme.com/tgk3kic">https://www.gofundme.com/tgk3kic</a>                                                                 |
| Support Darren's Kidney Transplant   | <a href="https://www.gofundme.com/nigqzc">https://www.gofundme.com/nigqzc</a>                                                                   |
| Kidney Transplant                    | <a href="https://www.gofundme.com/aherm4-kidney-transplant">https://www.gofundme.com/aherm4-kidney-transplant</a>                               |
| Kidney transplant - travel expenses  | <a href="https://www.gofundme.com/6m8ttg">https://www.gofundme.com/6m8ttg</a>                                                                   |
| Owen's Kidney Transplant 5/10/18!    | <a href="https://www.gofundme.com/owens-kidney-transplant-51018">https://www.gofundme.com/owens-kidney-transplant-51018</a>                     |
| Murran's Kidney Transplant Recovery  | <a href="https://www.gofundme.com/rg9w6d6c">https://www.gofundme.com/rg9w6d6c</a>                                                               |
| jacobs kidney transplant fundraiser  | <a href="https://www.gofundme.com/2ewwh4">https://www.gofundme.com/2ewwh4</a>                                                                   |
| Tara's Kidney Transplant             | <a href="https://www.gofundme.com/tara039s-kidney-transplant">https://www.gofundme.com/tara039s-kidney-transplant</a>                           |
| HELP ROXANNE KIDNEY TRANSPLANT       | <a href="https://www.gofundme.com/help-roxanne-kidney-transplant">https://www.gofundme.com/help-roxanne-kidney-transplant</a>                   |
| Sheldons Kidney Transplant Fund      | <a href="https://www.gofundme.com/gjgyc">https://www.gofundme.com/gjgyc</a>                                                                     |
| Our Kidney Transplant Journey        | <a href="https://www.gofundme.com/32z4c">https://www.gofundme.com/32z4c</a>                                                                     |
| My sister had a kidney transplant    | <a href="https://www.gofundme.com/my-sister-had-a-kidney-transplant">https://www.gofundme.com/my-sister-had-a-kidney-transplant</a>             |
| Hilborn family kidney transplant     | <a href="https://www.gofundme.com/hilborn-family-kidney-transplant">https://www.gofundme.com/hilborn-family-kidney-transplant</a>               |
| Medical kidney transplant surgery    | <a href="https://www.gofundme.com/medical-kidney-transplant-surgery">https://www.gofundme.com/medical-kidney-transplant-surgery</a>             |
| Kidney transplant                    | <a href="https://www.gofundme.com/vsvs2-kidney-transplant">https://www.gofundme.com/vsvs2-kidney-transplant</a>                                 |
| Kidney Transplant                    | <a href="https://www.gofundme.com/w65ev-kidney-transplant">https://www.gofundme.com/w65ev-kidney-transplant</a>                                 |
| Kidney Transplant for My Friend      | <a href="https://www.gofundme.com/cmtp5-kidney-transplant-for-my-friend">https://www.gofundme.com/cmtp5-kidney-transplant-for-my-friend</a>     |
| Kidney transplant & medical costs    | <a href="https://www.gofundme.com/rauh7-kidney-transplant-medical-costs">https://www.gofundme.com/rauh7-kidney-transplant-medical-costs</a>     |
| Father kidney transplant             | <a href="https://www.gofundme.com/father-kidney-transplant">https://www.gofundme.com/father-kidney-transplant</a>                               |
| RD's Kidney Transplant Expenses      | <a href="https://www.gofundme.com/rds-kidney-transplant-expenses">https://www.gofundme.com/rds-kidney-transplant-expenses</a>                   |
| Kidney Transplant Struggle flooded   | <a href="https://www.gofundme.com/377xa1c">https://www.gofundme.com/377xa1c</a>                                                                 |
| Lee's Fight                          | <a href="https://www.gofundme.com/lees-fight">https://www.gofundme.com/lees-fight</a>                                                           |
| My Sister's Disease                  | <a href="https://www.gofundme.com/My-Sisters-Disease">https://www.gofundme.com/My-Sisters-Disease</a>                                           |
| The Giunta Family Emergency Fund     | <a href="https://www.gofundme.com/7au7Dz">https://www.gofundme.com/7au7Dz</a>                                                                   |
| A new life for Michael               | <a href="https://www.gofundme.com/a-new-life-for-michael">https://www.gofundme.com/a-new-life-for-michael</a>                                   |
| Move Mountains for Amanda            | <a href="https://www.gofundme.com/5baw2o">https://www.gofundme.com/5baw2o</a>                                                                   |
| Kelly's Double Organ Transplant      | <a href="https://www.gofundme.com/HaveAHeartforKelly">https://www.gofundme.com/HaveAHeartforKelly</a>                                           |
| Pray for Karris and Kayden.          | <a href="https://www.gofundme.com/pray-for-kayden-and-karris">https://www.gofundme.com/pray-for-kayden-and-karris</a>                           |
| Care for Katie                       | <a href="https://www.gofundme.com/w3gfy-care-for-katie">https://www.gofundme.com/w3gfy-care-for-katie</a>                                       |
| Get Jes A Kidney & Get Him Walking   | <a href="https://www.gofundme.com/2j5zss">https://www.gofundme.com/2j5zss</a>                                                                   |
| Support our loving 'angel' donor     | <a href="https://www.gofundme.com/support-our-loving-039angel039-donor">https://www.gofundme.com/support-our-loving-039angel039-donor</a>       |
| Sending LOVE to Olivia the WARRIOR   | <a href="https://www.gofundme.com/sending-love-to-olivia">https://www.gofundme.com/sending-love-to-olivia</a>                                   |
| Nick's Kidney Fundraiser             | <a href="https://www.gofundme.com/nicks-kidney-fundraiser">https://www.gofundme.com/nicks-kidney-fundraiser</a>                                 |
| Sergio Osorio Kidney fund            | <a href="https://www.gofundme.com/sergio-osorio-kidney-fund">https://www.gofundme.com/sergio-osorio-kidney-fund</a>                             |
| Penn's Kidney Operation              | <a href="https://www.gofundme.com/pennskidneyoperation">https://www.gofundme.com/pennskidneyoperation</a>                                       |
| Mike Walsh Transplant Expenses       | <a href="https://www.gofundme.com/mike-walsh-transplant-expenses">https://www.gofundme.com/mike-walsh-transplant-expenses</a>                   |
| Bergmans for Bruno                   | <a href="https://www.gofundme.com/bravebergman">https://www.gofundme.com/bravebergman</a>                                                       |
| Endang's Battle with Renal Failure   | <a href="https://www.gofundme.com/endang039s-battle-with-renal-failure">https://www.gofundme.com/endang039s-battle-with-renal-failure</a>       |
| Ian Daryl's Kidney Recovery Fund     | <a href="https://www.gofundme.com/ian-daryls-kidney-recovery-fund-2uakgrk">https://www.gofundme.com/ian-daryls-kidney-recovery-fund-2uakgrk</a> |
| Operation Kidney                     | <a href="https://www.gofundme.com/shanerbertson">https://www.gofundme.com/shanerbertson</a>                                                     |
| Tarumi's Medical Bills               | <a href="https://www.gofundme.com/6e8b0">https://www.gofundme.com/6e8b0</a>                                                                     |
| MICHELLE NEEDS A KIDNEY              | <a href="https://www.gofundme.com/michelle-needs-a-kidney">https://www.gofundme.com/michelle-needs-a-kidney</a>                                 |
| Mila's Kidney k&b                    | <a href="https://www.gofundme.com/Milaskidneyklub">https://www.gofundme.com/Milaskidneyklub</a>                                                 |
| For a Teacher with Kidney Disease    | <a href="https://www.gofundme.com/ongkar">https://www.gofundme.com/ongkar</a>                                                                   |
| Support for our girl Stephanie       | <a href="https://www.gofundme.com/support-for-our-girl-stephanie">https://www.gofundme.com/support-for-our-girl-stephanie</a>                   |
| Tina's Transplant Fund               | <a href="https://www.gofundme.com/tinas-transplant-fund">https://www.gofundme.com/tinas-transplant-fund</a>                                     |
| Please Help Our Dad, Kevin           | <a href="https://www.gofundme.com/2h44zw">https://www.gofundme.com/2h44zw</a>                                                                   |
| Kidney for Darin Crosby              | <a href="https://www.gofundme.com/kidney-for-darin-crosby">https://www.gofundme.com/kidney-for-darin-crosby</a>                                 |
| AF's Kidney Recovery Fund            | <a href="https://www.gofundme.com/als-kidney-recovery-fund">https://www.gofundme.com/als-kidney-recovery-fund</a>                               |
| Support our Friends Nigel&Rhiannon   | <a href="https://www.gofundme.com/2jssuq4">https://www.gofundme.com/2jssuq4</a>                                                                 |
| The Punga's Transplant Fund          | <a href="https://www.gofundme.com/rodney-beth-need-our-help-2twfw">https://www.gofundme.com/rodney-beth-need-our-help-2twfw</a>                 |
| Thank You for your help!             | <a href="https://www.gofundme.com/cd4mbjs">https://www.gofundme.com/cd4mbjs</a>                                                                 |
| Jamie and Charlene need help         | <a href="https://www.gofundme.com/2gf5a3pg">https://www.gofundme.com/2gf5a3pg</a>                                                               |
| Funds for Daniel's Support Team      | <a href="https://www.gofundme.com/ooakd">https://www.gofundme.com/ooakd</a>                                                                     |
| Dan & Sandi Fleet Family Fundraiser  | <a href="https://www.gofundme.com/ku4y39g">https://www.gofundme.com/ku4y39g</a>                                                                 |
| Irene's Kidney Donation Fund         | <a href="https://www.gofundme.com/irenes-kidney-donation-fund">https://www.gofundme.com/irenes-kidney-donation-fund</a>                         |
| Rob's Surgery Towards a new Kidney!  | <a href="https://www.gofundme.com/robs-reconstruction">https://www.gofundme.com/robs-reconstruction</a>                                         |
| Support for Sean and Megan Quinn     | <a href="https://www.gofundme.com/support-for-sean-and-megan-quinn">https://www.gofundme.com/support-for-sean-and-megan-quinn</a>               |
| Merry Christmas Catherine & Cameron  | <a href="https://www.gofundme.com/merry-christmas-catherine-cameron">https://www.gofundme.com/merry-christmas-catherine-cameron</a>             |
| Young Girl Awaiting Transplant       | <a href="https://www.gofundme.com/4d1D">https://www.gofundme.com/4d1D</a>                                                                       |
| HELP ME KICK & CELL LYMPHOMA'S ASS   | <a href="https://www.gofundme.com/2f94p-help-me-kick-b-cell-lymphomas-ass">https://www.gofundme.com/2f94p-help-me-kick-b-cell-lymphomas-ass</a> |
| Shandra MacNeill Recovery Fund       | <a href="https://www.gofundme.com/shandramacneill">https://www.gofundme.com/shandramacneill</a>                                                 |
| Zac Morgan's Kidney Fund             | <a href="https://www.gofundme.com/2e43ht45">https://www.gofundme.com/2e43ht45</a>                                                               |
| Lynda's New Kidney - post-op fund    | <a href="https://www.gofundme.com/healthykidney">https://www.gofundme.com/healthykidney</a>                                                     |
| "Help Lisa fight the battle"         | <a href="https://www.gofundme.com/2uh4-help-lisa-fight-the-battle">https://www.gofundme.com/2uh4-help-lisa-fight-the-battle</a>                 |
| Bruan family transplant fund         | <a href="https://www.gofundme.com/v4e88d4">https://www.gofundme.com/v4e88d4</a>                                                                 |
| Dedece's fight for life              | <a href="https://www.gofundme.com/29pab6g">https://www.gofundme.com/29pab6g</a>                                                                 |
| Medical Travel expenses              | <a href="https://www.gofundme.com/5srmc-medical-travel-expenses">https://www.gofundme.com/5srmc-medical-travel-expenses</a>                     |
| Kidney failure medical expenses      | <a href="https://www.gofundme.com/rmtt-kidney-failure-medical-expenses">https://www.gofundme.com/rmtt-kidney-failure-medical-expenses</a>       |
| Steve Crane                          | <a href="https://www.gofundme.com/rg8ce6g">https://www.gofundme.com/rg8ce6g</a>                                                                 |
| Local couple need life saving help!  | <a href="https://www.gofundme.com/ournewkidney">https://www.gofundme.com/ournewkidney</a>                                                       |
| Baby Bentley                         | <a href="https://www.gofundme.com/4d4b7f8">https://www.gofundme.com/4d4b7f8</a>                                                                 |
| Louise Cousins Show Your Love        | <a href="https://www.gofundme.com/louise-cousins-medical-expenses">https://www.gofundme.com/louise-cousins-medical-expenses</a>                 |
| Rooting for Ryley Bustamante Heck    | <a href="https://www.gofundme.com/rooting-for-ryley">https://www.gofundme.com/rooting-for-ryley</a>                                             |
| Dayna needs a kidney and our help!   | <a href="https://www.gofundme.com/dayna-needs-our-help">https://www.gofundme.com/dayna-needs-our-help</a>                                       |
| Miguel's Donor Fund                  | <a href="https://www.gofundme.com/donorfund">https://www.gofundme.com/donorfund</a>                                                             |
| Kurtis Twinn's Get Well Fund         | <a href="https://www.gofundme.com/kkoag">https://www.gofundme.com/kkoag</a>                                                                     |
| Christopher's New Kidney             | <a href="https://www.gofundme.com/ua2jymk">https://www.gofundme.com/ua2jymk</a>                                                                 |
| HELP MY HERO!                        | <a href="https://www.gofundme.com/s2w7c">https://www.gofundme.com/s2w7c</a>                                                                     |
| Jeff & Debbie's Transplant Journey   | <a href="https://www.gofundme.com/jeff-amp-debbie039s-transplant-journey">https://www.gofundme.com/jeff-amp-debbie039s-transplant-journey</a>   |
| Help for the David Killacky family   | <a href="https://www.gofundme.com/help-for-the-david-killacky-family">https://www.gofundme.com/help-for-the-david-killacky-family</a>           |
| New Kidney for Hazel                 | <a href="https://www.gofundme.com/kidneyforhazel">https://www.gofundme.com/kidneyforhazel</a>                                                   |
| Kendra's Medical Funds.              | <a href="https://www.gofundme.com/kendras-medical-funds">https://www.gofundme.com/kendras-medical-funds</a>                                     |
| Love for the St. Louis               | <a href="https://www.gofundme.com/2baawaw">https://www.gofundme.com/2baawaw</a>                                                                 |
| Donate For Melanie Carriere!         | <a href="https://www.gofundme.com/6d4k">https://www.gofundme.com/6d4k</a>                                                                       |
| Jack's struggle for independence     | <a href="https://www.gofundme.com/jaxdward">https://www.gofundme.com/jaxdward</a>                                                               |
| Assist with a Live Kidney Donation!  | <a href="https://www.gofundme.com/heathersgiftoflife">https://www.gofundme.com/heathersgiftoflife</a>                                           |
| Gerry's Kidney Fund!                 | <a href="https://www.gofundme.com/n32wvc">https://www.gofundme.com/n32wvc</a>                                                                   |
| Jason Young's Healing Fund           | <a href="https://www.gofundme.com/jason-youngs-healing-fund">https://www.gofundme.com/jason-youngs-healing-fund</a>                             |
| Kenneth's Renal Transplant Surgery   | <a href="https://www.gofundme.com/kenneths-renal-transplant-surgery">https://www.gofundme.com/kenneths-renal-transplant-surgery</a>             |
| Help Kidney Donor Brodie Abbs        | <a href="https://www.gofundme.com/wgh9h9k">https://www.gofundme.com/wgh9h9k</a>                                                                 |
| Julie's Animals                      | <a href="https://www.gofundme.com/julies-animals">https://www.gofundme.com/julies-animals</a>                                                   |
| Kingston's Kidney Cousins            | <a href="https://www.gofundme.com/KidneyCousins">https://www.gofundme.com/KidneyCousins</a>                                                     |
| Support Steve Hay                    | <a href="https://www.gofundme.com/tb9tcr-support-steve">https://www.gofundme.com/tb9tcr-support-steve</a>                                       |
| Brianna's Medical and Support Fund   | <a href="https://www.gofundme.com/briannas-medical-and-support-fund">https://www.gofundme.com/briannas-medical-and-support-fund</a>             |
| Kimmi's road to recovery             | <a href="https://www.gofundme.com/kimmies-road-to-recovery">https://www.gofundme.com/kimmies-road-to-recovery</a>                               |
| Audrey's Transplant Fund             | <a href="https://www.gofundme.com/okg4s">https://www.gofundme.com/okg4s</a>                                                                     |

| Title                               | URL                                                                                                                                           |
|-------------------------------------|-----------------------------------------------------------------------------------------------------------------------------------------------|
| Let's help our friend Steve Howatt  | <a href="https://www.gofundme.com/d446s-lets-help-steve">https://www.gofundme.com/d446s-lets-help-steve</a>                                   |
| Stephen Crane                       | <a href="https://www.gofundme.com/23q9w98c">https://www.gofundme.com/23q9w98c</a>                                                             |
| REUBENS MEDICAL EXPENSES            | <a href="https://www.gofundme.com/w69k4c4">https://www.gofundme.com/w69k4c4</a>                                                               |
| A Sister's Love                     | <a href="https://www.gofundme.com/grunjhwc">https://www.gofundme.com/grunjhwc</a>                                                             |
| Loradel & Darwin Medical Funds      | <a href="https://www.gofundme.com/Loradel-and-Darwin">https://www.gofundme.com/Loradel-and-Darwin</a>                                         |
| Deserving Couple needs our Help!    | <a href="https://www.gofundme.com/courteyandpaul">https://www.gofundme.com/courteyandpaul</a>                                                 |
| Helping the Craig Family            | <a href="https://www.gofundme.com/helping-the-craig-family">https://www.gofundme.com/helping-the-craig-family</a>                             |
| Jordan's transplant & recovery      | <a href="https://www.gofundme.com/4dygic">https://www.gofundme.com/4dygic</a>                                                                 |
| Diamond Rally - Team St. Paul's     | <a href="https://www.gofundme.com/diamond-rally-team-st-paul-2018">https://www.gofundme.com/diamond-rally-team-st-paul-2018</a>               |
| A Kidney for Tiffany                | <a href="https://www.gofundme.com/usw4n4-a-kidney-for-tiffany">https://www.gofundme.com/usw4n4-a-kidney-for-tiffany</a>                       |
| Pray for Paul                       | <a href="https://www.gofundme.com/pray-for-paul">https://www.gofundme.com/pray-for-paul</a>                                                   |
| Kindness for Kris                   | <a href="https://www.gofundme.com/kindnesskris">https://www.gofundme.com/kindnesskris</a>                                                     |
| Raising money for a kidney          | <a href="https://www.gofundme.com/fe6aabo">https://www.gofundme.com/fe6aabo</a>                                                               |
| Her struggle continues              | <a href="https://www.gofundme.com/cqphuck">https://www.gofundme.com/cqphuck</a>                                                               |
| Dad's Health                        | <a href="https://www.gofundme.com/24erubwv">https://www.gofundme.com/24erubwv</a>                                                             |
| Robyn's Emergency                   | <a href="https://www.gofundme.com/Robynneedshelp">https://www.gofundme.com/Robynneedshelp</a>                                                 |
| Cathie's Recovery                   | <a href="https://www.gofundme.com/u2kgrfp">https://www.gofundme.com/u2kgrfp</a>                                                               |
| Cory-Living With Kidney Failure     | <a href="https://www.gofundme.com/3cqnaxc">https://www.gofundme.com/3cqnaxc</a>                                                               |
| Laurie Vinson Needs Our Help        | <a href="https://www.gofundme.com/lets-help-laurie">https://www.gofundme.com/lets-help-laurie</a>                                             |
| Medical expenses                    | <a href="https://www.gofundme.com/medical-expenses-2zph98uc">https://www.gofundme.com/medical-expenses-2zph98uc</a>                           |
| Support for Johnny's New Kidney -)  | <a href="https://www.gofundme.com/eu11384">https://www.gofundme.com/eu11384</a>                                                               |
| Roach family kidney donation.       | <a href="https://www.gofundme.com/w3khh8g">https://www.gofundme.com/w3khh8g</a>                                                               |
| help rebuild pats house so he stays | <a href="https://www.gofundme.com/help-pat-keep-above-water">https://www.gofundme.com/help-pat-keep-above-water</a>                           |
| Struggling Cancer Family            | <a href="https://www.gofundme.com/struggling-cancer-family">https://www.gofundme.com/struggling-cancer-family</a>                             |
| My Christmas Wish                   | <a href="https://www.gofundme.com/4vstv44">https://www.gofundme.com/4vstv44</a>                                                               |
| Grandma Gets Life Saving Transplant | <a href="https://www.gofundme.com/grandma-gets-life-saving-transplant">https://www.gofundme.com/grandma-gets-life-saving-transplant</a>       |
| Dwynne medical expenses             | <a href="https://www.gofundme.com/dwynnetransplant">https://www.gofundme.com/dwynnetransplant</a>                                             |
| Darryl and Sara's Kidney Fund       | <a href="https://www.gofundme.com/DarrylSaraKidney">https://www.gofundme.com/DarrylSaraKidney</a>                                             |
| Travel funds for Dialysis 3-week    | <a href="https://www.gofundme.com/travel-funds-for-dialysis-3week">https://www.gofundme.com/travel-funds-for-dialysis-3week</a>               |
| Kidney campaign                     | <a href="https://www.gofundme.com/kidney-campaign">https://www.gofundme.com/kidney-campaign</a>                                               |
| Shen's Kidney Quality of Life Fund  | <a href="https://www.gofundme.com/NWWMtracae-Sherry-kidney-donations">https://www.gofundme.com/NWWMtracae-Sherry-kidney-donations</a>         |
| Walker's Medical Fund               | <a href="https://www.gofundme.com/hvwt-walkers-medical-fund">https://www.gofundme.com/hvwt-walkers-medical-fund</a>                           |
| Kidney failure5                     | <a href="https://www.gofundme.com/kidney-failure5">https://www.gofundme.com/kidney-failure5</a>                                               |
| Almie's Kidney Medical Fund         | <a href="https://www.gofundme.com/almies-kidney-medical-fund">https://www.gofundme.com/almies-kidney-medical-fund</a>                         |
| Medical expenses                    | <a href="https://www.gofundme.com/6wbbv7-medical-expenses">https://www.gofundme.com/6wbbv7-medical-expenses</a>                               |
| Help For Jeremy & Rochelle          | <a href="https://www.gofundme.com/help-for-jeremy-rochelle">https://www.gofundme.com/help-for-jeremy-rochelle</a>                             |
| Susie's medical fund                | <a href="https://www.gofundme.com/hzg34-susies-medical-fund">https://www.gofundme.com/hzg34-susies-medical-fund</a>                           |
| Briens Medical Fund                 | <a href="https://www.gofundme.com/8fry7v-briens-medical-fund">https://www.gofundme.com/8fry7v-briens-medical-fund</a>                         |
| Alex's transplant recovery          | <a href="https://www.gofundme.com/healthy-transplant-new-life">https://www.gofundme.com/healthy-transplant-new-life</a>                       |
| Kidney/ Pancreas Costs              | <a href="https://www.gofundme.com/kidney-pancreas-costs">https://www.gofundme.com/kidney-pancreas-costs</a>                                   |
| The Murray Family Crisis            | <a href="https://www.gofundme.com/the-murray-family-crisis">https://www.gofundme.com/the-murray-family-crisis</a>                             |
| Help me, help my mom                | <a href="https://www.gofundme.com/mqaup-help-me-help-my-mom">https://www.gofundme.com/mqaup-help-me-help-my-mom</a>                           |
| Dan's transplant campaign           | <a href="https://www.gofundme.com/nkk00bs">https://www.gofundme.com/nkk00bs</a>                                                               |
| Nia's Medical Fund                  | <a href="https://www.gofundme.com/niras-medical-fund">https://www.gofundme.com/niras-medical-fund</a>                                         |
| Avinis Jequeline Gauthier           | <a href="https://www.gofundme.com/776irs">https://www.gofundme.com/776irs</a>                                                                 |
| Matts Donation To His Sister        | <a href="https://www.gofundme.com/matthehelpingsister">https://www.gofundme.com/matthehelpingsister</a>                                       |
| New life with transplant costs much | <a href="https://www.gofundme.com/new-life-with-transplant-costs-much">https://www.gofundme.com/new-life-with-transplant-costs-much</a>       |
| Keanna's Medical & Travel Expenses  | <a href="https://www.gofundme.com/kidneyforkeanna">https://www.gofundme.com/kidneyforkeanna</a>                                               |
| Two friends one kidney              | <a href="https://www.gofundme.com/c30i9w">https://www.gofundme.com/c30i9w</a>                                                                 |
| Christina's Medical Fund            | <a href="https://www.gofundme.com/80wew58">https://www.gofundme.com/80wew58</a>                                                               |
| Donations needed for trip to ablien | <a href="https://www.gofundme.com/5ghvhw">https://www.gofundme.com/5ghvhw</a>                                                                 |
| brakes on truck ... new glasses     | <a href="https://www.gofundme.com/my-new-galbes">https://www.gofundme.com/my-new-galbes</a>                                                   |
| Chad Penners Medical fund Help!     | <a href="https://www.gofundme.com/chad-penners-medical-fund-help">https://www.gofundme.com/chad-penners-medical-fund-help</a>                 |
| Winston's medical expenses          | <a href="https://www.gofundme.com/2kpadpws">https://www.gofundme.com/2kpadpws</a>                                                             |
| Fund Matt                           | <a href="https://www.gofundme.com/fund-mat">https://www.gofundme.com/fund-mat</a>                                                             |
| Friend in need                      | <a href="https://www.gofundme.com/adap8-friend-in-need">https://www.gofundme.com/adap8-friend-in-need</a>                                     |
| Desiree Bouchard - Kidney Donation  | <a href="https://www.gofundme.com/desiree-bouchard-kidney-donation">https://www.gofundme.com/desiree-bouchard-kidney-donation</a>             |
| Peter Fox's Kidney Quest            | <a href="https://www.gofundme.com/oq1po8">https://www.gofundme.com/oq1po8</a>                                                                 |
| Help Stacy Boggs                    | <a href="https://www.gofundme.com/help-stacy-boggs">https://www.gofundme.com/help-stacy-boggs</a>                                             |
| Family Lopez transplant support     | <a href="https://www.gofundme.com/family-lopez-transplant-support">https://www.gofundme.com/family-lopez-transplant-support</a>               |
| A Kidney for Pete's Sake!           | <a href="https://www.gofundme.com/kidneyfettesake">https://www.gofundme.com/kidneyfettesake</a>                                               |
| Needs Double Transplant & Laidoff   | <a href="https://www.gofundme.com/needs-double-transplant-laidoff">https://www.gofundme.com/needs-double-transplant-laidoff</a>               |
| Dreille is Getting a Kidney!        | <a href="https://www.gofundme.com/engc-dreille039s-getting-a-kidney">https://www.gofundme.com/engc-dreille039s-getting-a-kidney</a>           |
| Lindsay Villeneuve kidney donor     | <a href="https://www.gofundme.com/lindsayvilleneuve-kidney-donor">https://www.gofundme.com/lindsayvilleneuve-kidney-donor</a>                 |
| Luke's Kidney donation fund         | <a href="https://www.gofundme.com/2mdaegc">https://www.gofundme.com/2mdaegc</a>                                                               |
| Help Shemin through her Transplant! | <a href="https://www.gofundme.com/2tw7q57w">https://www.gofundme.com/2tw7q57w</a>                                                             |
| Christopher's Kidney Fund           | <a href="https://www.gofundme.com/2jx2y7fw">https://www.gofundme.com/2jx2y7fw</a>                                                             |
| Flourence and Terence's transplant  | <a href="https://www.gofundme.com/2ba28g8j">https://www.gofundme.com/2ba28g8j</a>                                                             |
| Get Amber A Kidney                  | <a href="https://www.gofundme.com/6f557k">https://www.gofundme.com/6f557k</a>                                                                 |
| Father saves Daughter with Kidney   | <a href="https://www.gofundme.com/helpipoliaskidney">https://www.gofundme.com/helpipoliaskidney</a>                                           |
| transplant for Jessica Peterson     | <a href="https://www.gofundme.com/fundsfortransplant">https://www.gofundme.com/fundsfortransplant</a>                                         |
| Cory's battle with kidney disease   | <a href="https://www.gofundme.com/corys-battle-with-kidney-disease">https://www.gofundme.com/corys-battle-with-kidney-disease</a>             |
| AL's kidney fund                    | <a href="https://www.gofundme.com/yf6w4q7f">https://www.gofundme.com/yf6w4q7f</a>                                                             |
| Gwynnair's Transplant Journey       | <a href="https://www.gofundme.com/gwynnair">https://www.gofundme.com/gwynnair</a>                                                             |
| Natalie's Transplant Fund           | <a href="https://www.gofundme.com/NatsTransplantFund">https://www.gofundme.com/NatsTransplantFund</a>                                         |
| Maureen and Carl's Kidney Campaign  | <a href="https://www.gofundme.com/maureen-and-carls-kidney-campaign">https://www.gofundme.com/maureen-and-carls-kidney-campaign</a>           |
| Find my Mom a kidney please         | <a href="https://www.gofundme.com/find-my-mom-a-kidney-please">https://www.gofundme.com/find-my-mom-a-kidney-please</a>                       |
| Need extra cash for kidney          | <a href="https://www.gofundme.com/need-extra-cash-for-kidney">https://www.gofundme.com/need-extra-cash-for-kidney</a>                         |
| Help Shelley get a transplant       | <a href="https://www.gofundme.com/help-shelley-get-a-transplant">https://www.gofundme.com/help-shelley-get-a-transplant</a>                   |
| I'm donating my kidney              | <a href="https://www.gofundme.com/im-donating-my-kidney">https://www.gofundme.com/im-donating-my-kidney</a>                                   |
| Jermaine's coming Artificial Kidney | <a href="https://www.gofundme.com/jermaine-coming-artificial-kidney">https://www.gofundme.com/jermaine-coming-artificial-kidney</a>           |
| Hewlette Mariele's Medical Funds    | <a href="https://www.gofundme.com/n66pe-hewlette-marielles-medical-funds">https://www.gofundme.com/n66pe-hewlette-marielles-medical-funds</a> |
| Peter's Fund                        | <a href="https://www.gofundme.com/petercameron">https://www.gofundme.com/petercameron</a>                                                     |
| Our Fight for Kris and His Family   | <a href="https://www.gofundme.com/our-fight-for-kris-and-his-family">https://www.gofundme.com/our-fight-for-kris-and-his-family</a>           |
| Go Fund the kay's                   | <a href="https://www.gofundme.com/m33k">https://www.gofundme.com/m33k</a>                                                                     |
| Surgey a success!                   | <a href="https://www.gofundme.com/hy4h4qg">https://www.gofundme.com/hy4h4qg</a>                                                               |
| Dad's Medical Fund                  | <a href="https://www.gofundme.com/m212ar">https://www.gofundme.com/m212ar</a>                                                                 |
| Ken's Medical Fund                  | <a href="https://www.gofundme.com/mns-kens-medical-fund">https://www.gofundme.com/mns-kens-medical-fund</a>                                   |
| Miller/Clark Medical Fund           | <a href="https://www.gofundme.com/millerclark-medical-fund">https://www.gofundme.com/millerclark-medical-fund</a>                             |
| Shon's Drive To Dialysis            | <a href="https://www.gofundme.com/pez1g0">https://www.gofundme.com/pez1g0</a>                                                                 |
| Helping Dexter's Dad                | <a href="https://www.gofundme.com/supportforeinar">https://www.gofundme.com/supportforeinar</a>                                               |
| Shane's Fundraiser                  | <a href="https://www.gofundme.com/hu1888">https://www.gofundme.com/hu1888</a>                                                                 |
| Macintyre Family Fund               | <a href="https://www.gofundme.com/2ba32wvc">https://www.gofundme.com/2ba32wvc</a>                                                             |
| Help With Medical expenses          | <a href="https://www.gofundme.com/29k2m6v">https://www.gofundme.com/29k2m6v</a>                                                               |
| Devon's New Life                    | <a href="https://www.gofundme.com/2am3h3vg">https://www.gofundme.com/2am3h3vg</a>                                                             |
| Carol Pollard's dialysis & medical  | <a href="https://www.gofundme.com/2kshweje4">https://www.gofundme.com/2kshweje4</a>                                                           |
| My sister, saved my sons life       | <a href="https://www.gofundme.com/3ethwh7j">https://www.gofundme.com/3ethwh7j</a>                                                             |
| Donations for sonya wilson          | <a href="https://www.gofundme.com/ky4h78">https://www.gofundme.com/ky4h78</a>                                                                 |
| Help Kyle                           | <a href="https://www.gofundme.com/help-kyle-2w87pd7">https://www.gofundme.com/help-kyle-2w87pd7</a>                                           |
| Medical help                        | <a href="https://www.gofundme.com/hsd7y6k">https://www.gofundme.com/hsd7y6k</a>                                                               |
| Angela's Healing                    | <a href="https://www.gofundme.com/support-for-angelas-healing">https://www.gofundme.com/support-for-angelas-healing</a>                       |
| Help Save Erica                     | <a href="https://www.gofundme.com/savejamie2017">https://www.gofundme.com/savejamie2017</a>                                                   |
| Leah Kidney donor for Dallas        | <a href="https://www.gofundme.com/leah-kidney-donor-for-dallas">https://www.gofundme.com/leah-kidney-donor-for-dallas</a>                     |
| Bonnie's road to recovery           | <a href="https://www.gofundme.com/bonnies-road-to-recovery">https://www.gofundme.com/bonnies-road-to-recovery</a>                             |
| Mother of two donating kidney       | <a href="https://www.gofundme.com/momdonateskidney">https://www.gofundme.com/momdonateskidney</a>                                             |
| Local Mom to give kidney to another | <a href="https://www.gofundme.com/0l55j8">https://www.gofundme.com/0l55j8</a>                                                                 |
| Colleen Keefe Medical Fundraiser    | <a href="https://www.gofundme.com/colleenkeefe">https://www.gofundme.com/colleenkeefe</a>                                                     |
| Brads Portable Oxygen Concentrator  | <a href="https://www.gofundme.com/bradoxygenconcentrator">https://www.gofundme.com/bradoxygenconcentrator</a>                                 |
| Farah's life line                   | <a href="https://www.gofundme.com/farahs-life-line">https://www.gofundme.com/farahs-life-line</a>                                             |
| Chrissy's New Kidney Fund           | <a href="https://www.gofundme.com/chrissies-new-kidney-fund">https://www.gofundme.com/chrissies-new-kidney-fund</a>                           |
| Donor trip                          | <a href="https://www.gofundme.com/donor-trip">https://www.gofundme.com/donor-trip</a>                                                         |
| I'm Donating a Kidney!              | <a href="https://www.gofundme.com/baf4fm0">https://www.gofundme.com/baf4fm0</a>                                                               |
| My Little Boy Needs a Kidney        | <a href="https://www.gofundme.com/my-little-boy-needs-a-kidney">https://www.gofundme.com/my-little-boy-needs-a-kidney</a>                     |
| Sheldon's Kidney Medical Fund       | <a href="https://www.gofundme.com/g231x33s">https://www.gofundme.com/g231x33s</a>                                                             |
| Help Bennett find a kidney          | <a href="https://www.gofundme.com/dy6b04">https://www.gofundme.com/dy6b04</a>                                                                 |
| Karin needs a kidney                | <a href="https://www.gofundme.com/karin-needs-a-kidney">https://www.gofundme.com/karin-needs-a-kidney</a>                                     |
| Sheep Family Relief Fund            | <a href="https://www.gofundme.com/sheep-family-relief-fund">https://www.gofundme.com/sheep-family-relief-fund</a>                             |
| Help Baby Sophia Recover!!!         | <a href="https://www.gofundme.com/ksfuo">https://www.gofundme.com/ksfuo</a>                                                                   |
| Jeff's Medical Fund                 | <a href="https://www.gofundme.com/jeffs-medical-fund">https://www.gofundme.com/jeffs-medical-fund</a>                                         |
| Kristen's Kidney Donation Fund      | <a href="https://www.gofundme.com/kristens-kidney-donation-fund">https://www.gofundme.com/kristens-kidney-donation-fund</a>                   |
| Need help while on kidney Dialysis  | <a href="https://www.gofundme.com/need-help-while-on-kidney-dialysis">https://www.gofundme.com/need-help-while-on-kidney-dialysis</a>         |
| Jay's Medical Fund                  | <a href="https://www.gofundme.com/jah03-jays-medical-fund">https://www.gofundme.com/jah03-jays-medical-fund</a>                               |
| Annie's Fundraising Campaign        | <a href="https://www.gofundme.com/og6hnd">https://www.gofundme.com/og6hnd</a>                                                                 |
